# Supplementary material for: Integrated IMR for Psychiatric and General Medical Illness for Adults Aged 50 or Older With Serious Mental Illness
Source: Atypon-hosted journal article supplement (doi:10.1176/appi.ps.201300023), 2013-12-02
Supplement: 330_ds001.pdf [file 330_ds001.pdf]

**Appendix 1 I-IMR modules for psychiatric and medical illness self-management**

| <b>Psychiatric Illness (Adapted from IMR – Illness Management and Recovery)</b> | <b>Medical Illness Management and Wellness</b>         |
|---------------------------------------------------------------------------------|--------------------------------------------------------|
| Recovery                                                                        | Wellness                                               |
| Psychoeducation on Mental Illness                                               | Education on Medical Illness                           |
| Stress Vulnerability and Mental Illness                                         | Stress Vulnerability and Medical Illness               |
| Building Social Supports and Recovery                                           | Building Social Supports and Wellness                  |
| Psychiatric Medication Adherence Strategies                                     | Medical Medication Adherence Strategies                |
| Psychiatric Relapse Prevention                                                  | Medical Relapse Prevention                             |
| Coping with Stress and Solving Problems                                         | Coping with Health-related Stress and Solving Problems |
| Coping with Psychiatric Symptoms                                                | Coping with Chronic Pain and Medical Symptoms          |
| Substance Abuse                                                                 | Medication Misuse                                      |
| A Guide to Navigating the Mental Health System                                  | A Guide to Navigating the Medical Health Care System   |
